# Supplementary material
Source: Springer Nature journal article supplement (https://www.springermedizin.de/resource/supplementary/12946_2011_147_MOESM1_ESM.pdf/9555262)

Regeneration group:
 

- ▾ = 3-0 weeks
- = 6-0 weeks
- = 6-3 weeks

↑ = Up regulated  
 ↓ = Down regulated

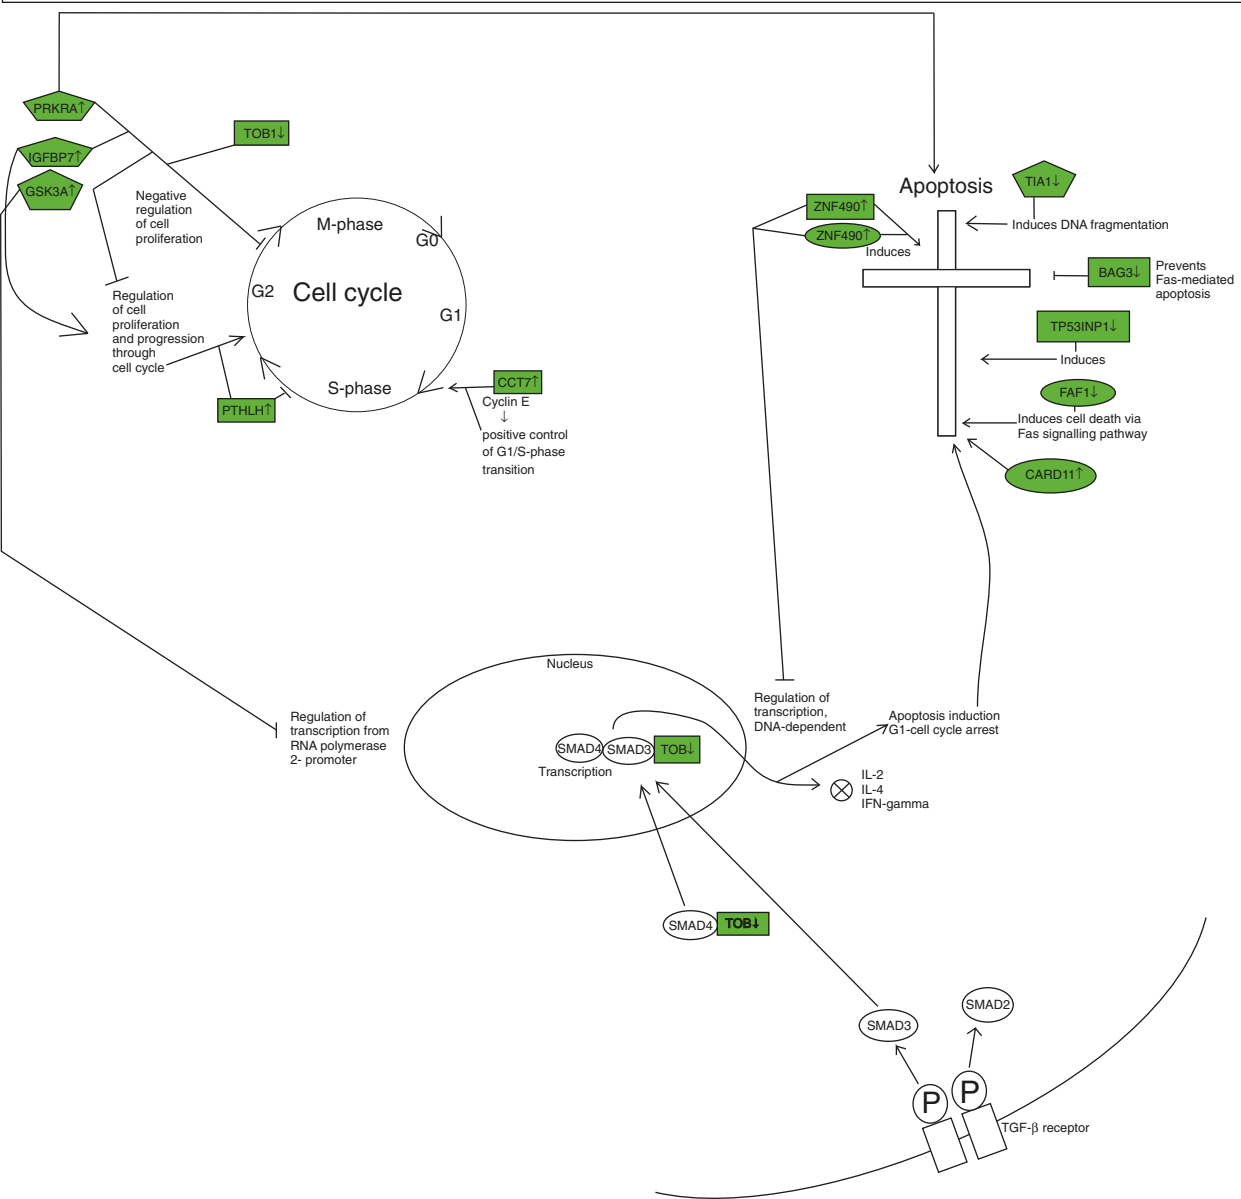

Supplement: MOESM1 [file 9555262]
